# Supplementary material for: Translation into Clinical Practice of the G1-G7 Molecular Subgroup Classification of Glioblastoma: Comprehensive Demographic and Molecular Pathway Profiling
Source: MDPI journal article supplement (doi:10.3390/cancers16020361), 2024-01-15
Supplement: s1 [file s1]

## **SUPPLEMENTAL FIGURES S1-S5 AND TABLES S1-S3**

### **FIGURES**

- S1: Glioblastoma cohorts: age and race comparison.
- S2: G6/Multi-RTK subgroup: tumor morphology.
- S3: PI3K pathway genomic alterations: intrapathway and molecular subgroup correlations.
- S4: Subgroup associations with G1-phase and p53 pathway effectors: correlation matrix p values.
- S5: Cell cycle G1 phase and p53 pathway genomic alterations: intrapathway and interpathway correlations.

### **TABLES**

- S1: Proportion of cases diagnosed by histologic or molecular criteria in the G1-G7 subgroups.
- S2: CMV analysis: Chromosome alterations in G1-G7 molecular subgroups.
- S3: Surgical modalities in the G1-G7 molecular subgroups.

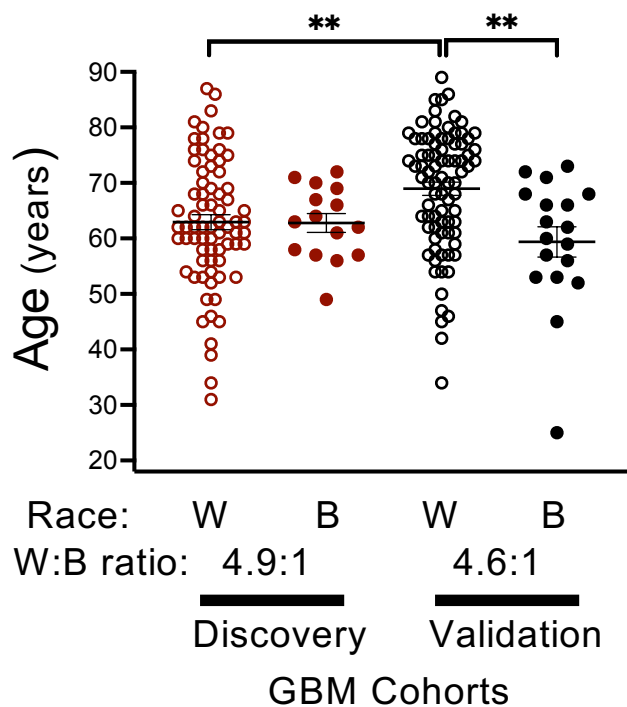

**Supplemental Figure S1. Glioblastoma cohorts: age and race comparison.** Age distribution as mean $\pm$ SEM of individual values in Caucasian/White (W) and African-American/Black (B) patients from the Discovery and Validation glioblastoma (GBM) cohorts. Statistical significance: \*\*, p<0.005.

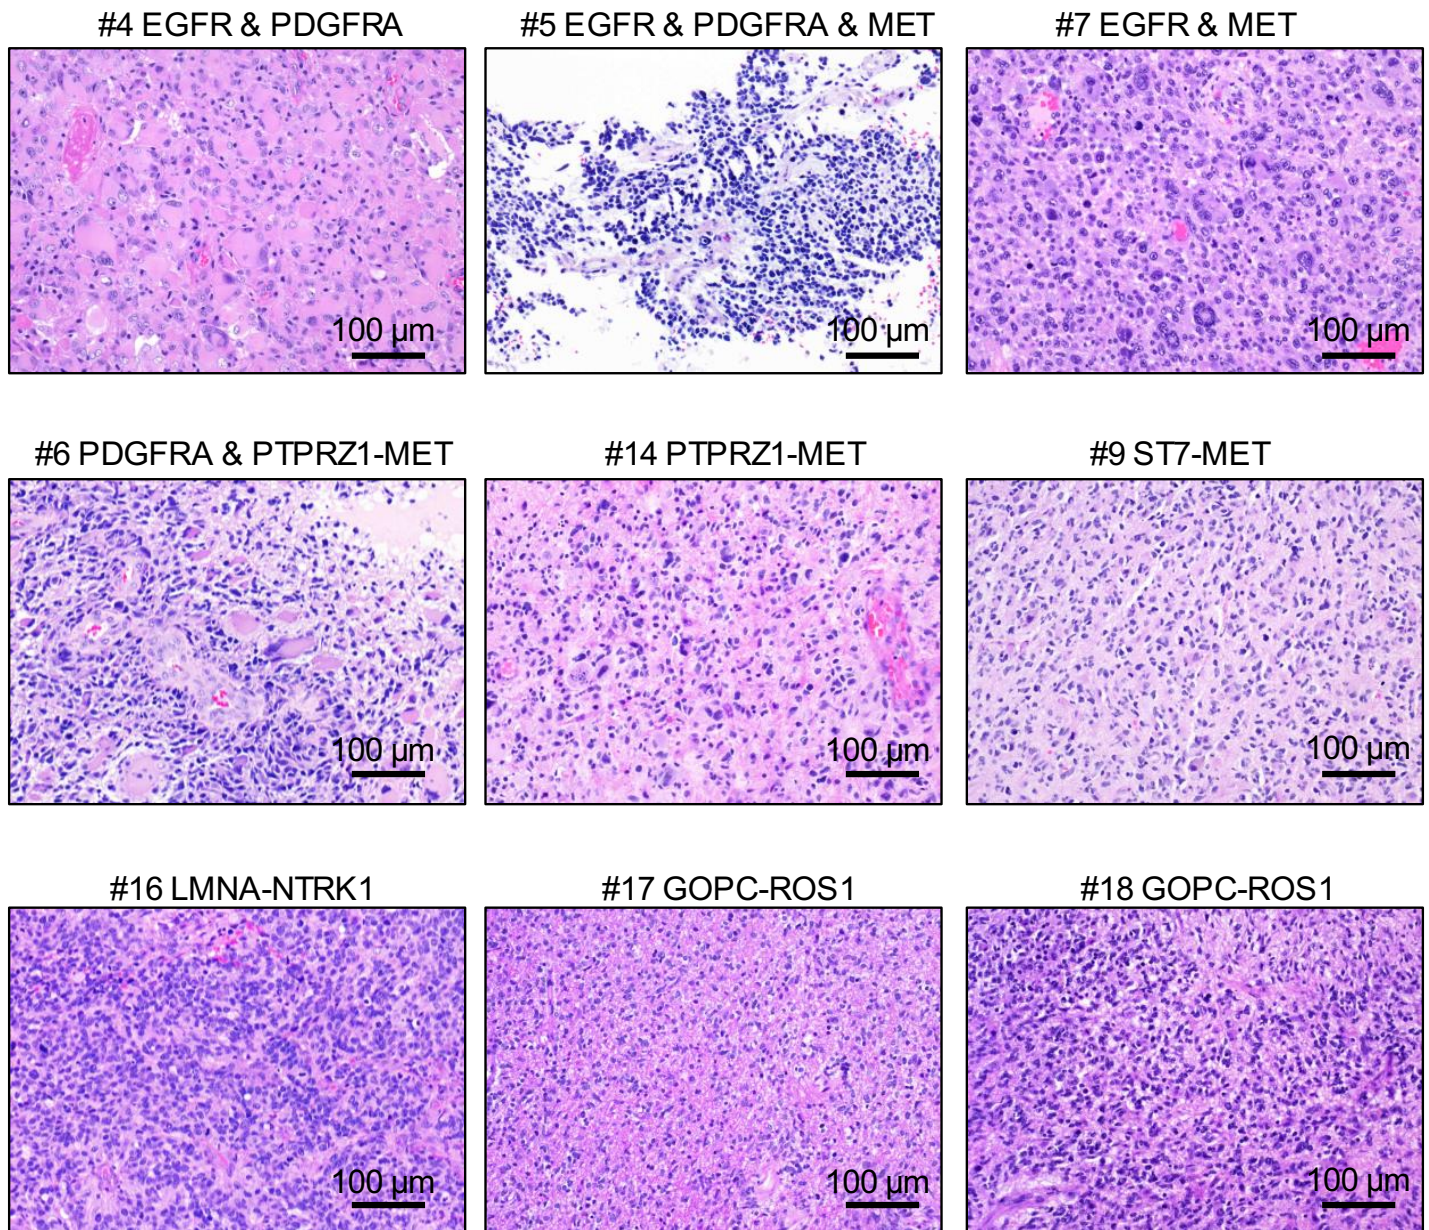

**Supplemental Figure S2. G6/Multi-RTK subgroup: tumor morphology.** The morphology in the G6/Multi-RTK subgroup varies along histologic patterns belonging to the #3/Anaplastic and #5/Epithelioid clusters, the latter mostly with gemistocytic and giant cell morphologies. In the #3/Anaplastic cluster, most cases showed pre-HGNE (high-grade neuroendocrine) morphology and only two cases, #5 and #6, both with *PDGFRA* and *MET* alterations, showed HGNE morphology.

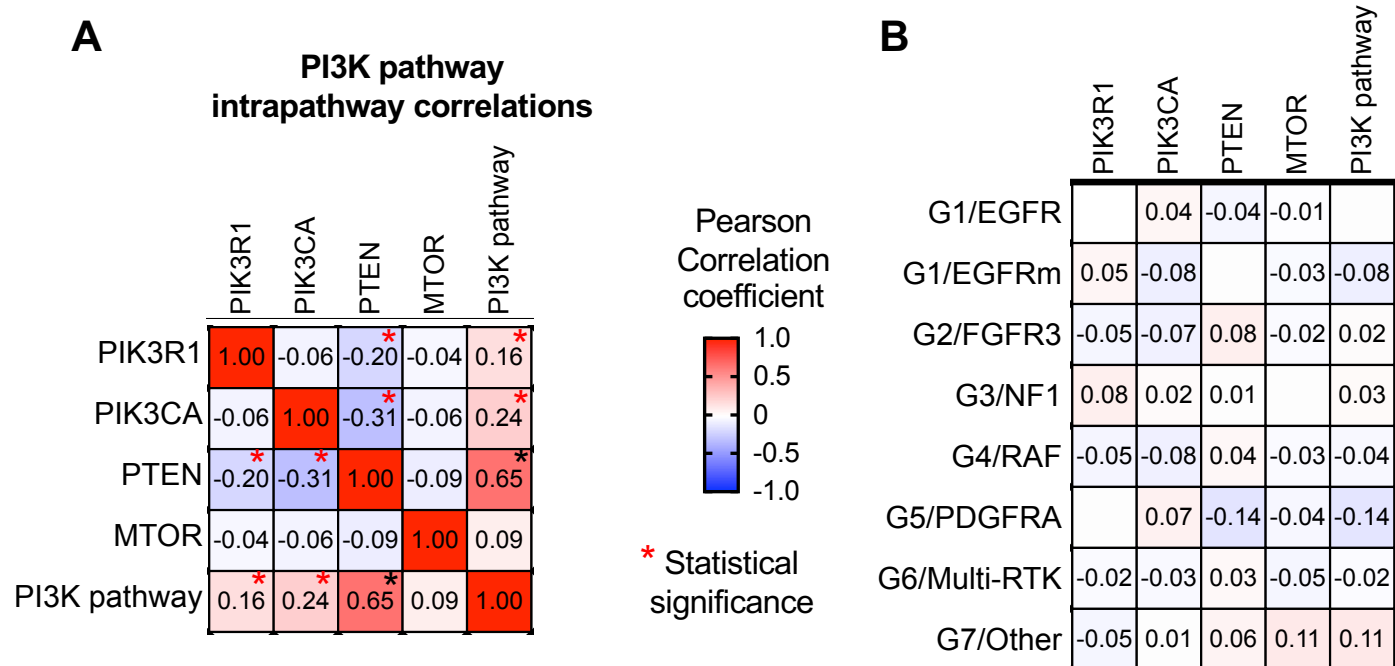

**Supplemental Figure S3. PI3K pathway genomic alterations: intrapathway and molecular subgroup correlations.**

**A.** Correlation matrix showing PI3K intrapathway associations between its effectors. Note statistically significant inverse correlations between *PTEN* and either *PIK3R1* or *PIK3CA* alterations. Note also significant contributions of *PTEN* genomic alterations, accounting for most of the cases, *PIK3CA* and *PIK3R1* mutations to the PI3K pathway mutational landscape of the entire glioblastoma cohort. Asterisk (\*) indicates statistically significant correlations; p-values decrease as the absolute value of the Pearson correlation coefficient increases.

**B.** Correlation matrix showing the associations between the mutant PI3K effectors and the molecular subgroups. Note that there is negative correlation between PI3K pathway mutations (absence of *PTEN* mutations) and the G5/PDGFRA molecular subgroup not reaching statistical significance.

|              | CDKN2A/2B  | CDK4/6     | RB1        | CC G1 phase | TP53       | MDM2       | MDM4       | RPL5       | p53 pathway |
|--------------|------------|------------|------------|-------------|------------|------------|------------|------------|-------------|
| G1/EGFRa     | 0.00123498 | 0.02908547 | 0.04658202 | 0.63488473  | 0.00130409 | 0.08128105 | 0.66780354 | 0.76717243 | 0.00029289  |
| G1/EGFRm     | 0.57460197 | 0.92431026 | 0.12084127 | 0.24344756  | 0.28258094 | 0.44531871 | 0.36237370 | 0.52993044 | 0.84949212  |
| G2/FGFR3     | 0.72167991 | 0.82721764 | 0.97359421 | 0.31517780  | 0.40328734 | 0.19166302 | 0.43276816 | 0.58848356 | 0.87014213  |
| G3/NF1       | 0.09027526 | 0.00169618 | 0.68249627 | 0.86626711  | 0.98408226 | 0.16902376 | 0.06168429 | 0.47119463 | 0.12856411  |
| G4/RAF       | 0.72167991 | 0.32542199 | 0.25963459 | 0.17237123  | 0.40328734 | 0.51092976 | 0.43276816 | 0.15100215 | 0.32194673  |
| G5/PDGFRA    | 0.46646433 | 0.06308037 | 0.09029781 | 0.49245532  | 0.89182420 | 0.18859057 | 0.42113779 | 0.41692306 | 0.23567437  |
| G6/Multi-RTK | 0.66060509 | 0.85225346 | 0.78722583 | 0.90805937  | 0.07840290 | 0.76267177 | 0.00922890 | 0.92282546 | 0.01141967  |
| G7/Other     | 0.00000001 | 0.00000083 | 0.00541539 | 0.27001009  | 0.01215739 | 0.01979488 | 0.87791524 | 0.46558644 | 0.00031069  |

**Supplemental Figure S4. Subgroup associations with G1-phase and p53 pathway effectors: p values for the correlation matrix showed in Fig. 4I.** The p values for the correlation matrix in Fig. 4I showing the associations between the G1-G7 molecular subgroups and the cell cycle (CC) G1-phase and p53 pathway effectors are illustrated color-coded for direct correlations (brown hues) or inverse correlations (blue hues).



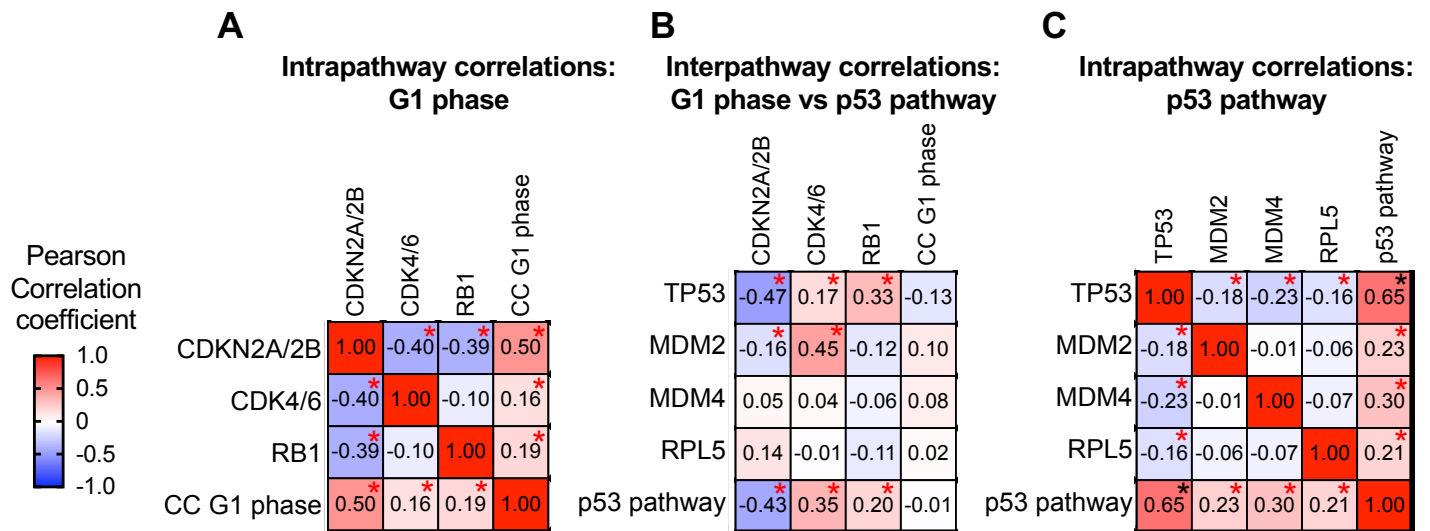

**Supplemental Figure S5. Cell cycle G1 phase and p53 pathway genomic alterations: intrapathway and interpathway correlations.**

**A.** Correlation matrix showing cell cycle (CC) G1 phase intrapathway associations between its effectors. Note statistically significant inverse correlations between *CDKN2A/2B* homozygous loss and either *CDK4* or *RB1* alterations. The two cases with *CDK6* amplification from the G6/Multi-RTK subgroup were also included. Note also significant contributions of *CDKN2A/2B* deletions, accounting for most of the cases, *RB1* and *CDK4/6* alterations to the G1 phase mutational landscape of the entire glioblastoma cohort. Asterisk (\*) indicates statistically significant correlations; p-values decrease as the absolute value of the Pearson correlation coefficient increases.

**B.** Interpathway correlation matrix showing the associations between the alterations of G1 phase and p53 pathway effectors. Note strong inverse correlation between *CDKN2A/2B* deletions and *TP53* mutations, and less with *MDM2* amplification, strong direct correlation between *CDK4/6* amplification and *MDM2* amplification, and less with *TP53* mutations, and strong direct correlation between *RB1* and *TP53* alterations. *RPL5* mutations appear to associate with *CDKN2A/B* deletion, but more cases are necessary for statistical significance.

**C.** Correlation matrix showing p53 intrapathway associations between its effectors. Note statistically significant inverse correlations between *TP53* alterations and either *MDM2*, *MDM4* or *RPL5* alterations. Note also the most important contribution of *TP53* to the p53 pathway mutational landscape, followed by *MDM4*, *MDM2* and *RPL5*.

**Supplemental Table S1:** Histologic versus molecular criteria for glioblastoma (GBM) diagnosis in the Combined cohort.

| GBM Subgroup      | *Histology (% cases) | ^Molecular (% cases) |
|-------------------|----------------------|----------------------|
| G1/EGFR-amplified | 95                   | 5                    |
| G1/EGFR-mutant    | 62                   | 38                   |
| G2/FGFR3          | 100                  | 0                    |
| G3/NF1            | 100                  | 0                    |
| G3/MMR            | 100                  | 0                    |
| G4/RAF            | 100                  | 0                    |
| G5/PFGFRA         | 92                   | 8                    |
| G6/MultiRTK       | 85                   | 15                   |
| G7/Other          | 90                   | 10                   |
| Total GBM         | 93                   | 7                    |

\* Histologic criteria include necrosis and/or microvascular proliferation.

^ Molecular criteria are EGFR amplification, TERT promoter mutation or chromosome 7 gain&10 loss in an IDH-wild-type diffuse astrocytoma.

**Supplemental Table S2:** Proportions (%) of glioblastoma (GBM) cases with indicated entire\* chromosome alterations.

\*Only entire or almost entire chromosome alterations are shown, except for chromosome 10, where either entire or q arm losses are included (10/10q-). Only the chromosomes with high incidence of alterations in glioblastoma are shown.

N, number of cases; Chromosome: +, gain; -, loss; +/-, either gain or loss; 19 mix, chromosome 19 with complex losses and gains.

| Chromosomes<br>Subgroups | N  | 4+/- | 6-    | 7+   | 10/10q- | 7+&10- | 11-  | 13-   | 14-  | 15-  | 18-  |
|--------------------------|----|------|-------|------|---------|--------|------|-------|------|------|------|
| G1/EGFRa                 | 50 | 6    | 4     | 86   | 90      | 86     | 0    | 14    | 14   | 6    | 4    |
| G1/EGFRm                 | 8  | 0    | 25    | 87.5 | 100     | 87.5   | 0    | 37.5  | 50   | 25   | 12.5 |
| G2/FGFR3                 | 6  | 16.7 | 16.67 | 100  | 100     | 100    | 0    | 16.67 | 0    | 0    | 0    |
| G3/NF1                   | 43 | 9.3  | 18.6  | 60.5 | 76.7    | 51.2   | 11.6 | 37.2  | 18.6 | 9.3  | 23.3 |
| G3/MMR                   | 5  | 20   | 0     | 40   | 20      | 0      | 0    | 60    | 20   | 0    | 20   |
| G4/RAF                   | 4  | 0    | 0     | 100  | 100     | 100    | 0    | 0     | 25   | 0    | 0    |
| G5/PFGFRA                | 12 | 66.7 | 16.7  | 58.3 | 66.7    | 58.3   | 41.7 | 58.3  | 33.3 | 33.3 | 8.3  |
| G6/MultiRTK              | 17 | 11.8 | 0.0   | 88.2 | 100.0   | 88.2   | 17.6 | 29.4  | 41.2 | 5.9  | 5.9  |
| G7/Other                 | 35 | 14.3 | 14.3  | 82.9 | 91.4    | 77.1   | 11.4 | 60.0  | 28.6 | 34.3 | 11.4 |

| Chromosomes<br>Subgroups | 19+  | 19 mix | 20+  | 22+/- |
|--------------------------|------|--------|------|-------|
| G1/EGFRa                 | 36   | 2      | 34   | 28    |
| G1/EGFRm                 | 12.5 | 0      | 37.5 | 50    |
| G2/FGFR3                 | 33.3 | 0.0    | 16.7 | 33.3  |
| G3/NF1                   | 25.6 | 16.3   | 23.3 | 30.2  |
| G3/MMR                   | 20   | 0      | 20   | 40    |
| G4/RAF                   | 25   | 25     | 50   | 75    |
| G5/PFGFRA                | 16.7 | 8.3    | 8.3  | 25.0  |
| G6/MultiRTK              | 11.8 | 23.5   | 5.9  | 29.4  |
| G7/Other                 | 11.4 | 5.7    | 8.6  | 25.7  |



**Supplemental Table S3:** Proportions (%) of glioblastoma (GBM) cases with biopsy, subtotal resection (STR) or gross total resection (GTR) in the Combined cohort.

| <b>Molecular Subgroups</b> | <b>Biopsy</b> | <b>STR</b> | <b>GTR</b> |
|----------------------------|---------------|------------|------------|
| G1/EGFR-amplified          | 18            | 28         | 54         |
| G1/EGFR-mutant             | 50            | 12         | 38         |
| G2/FGFR3                   | 17            | 0          | 83         |
| G3/NF1                     | 14            | 23         | 63         |
| G3/MMR                     | 40            | 20         | 40         |
| G4/RAF                     | 34            | 33         | 33         |
| G5/PFGFRA                  | 38            | 24         | 38         |
| G6/MultiRTK                | 30            | 10         | 60         |
| G7/Other                   | 32            | 22         | 46         |
| Not sequenced              | 66            | 17         | 17         |
| Total GBM                  | 26            | 22         | 52         |

Total resection for glioblastoma refers only to the enhancing area on brain imaging.
